# Supplementary material
Source: PubMed Central journal article supplement (PMC6533607)
Supplement: ac9b00856_si_001.pdf [file ac9b00856_si_001.pdf]

# Supporting Information

## High-Fidelity Nanopore Sequencing of Ultra-Short DNA Targets

Brandon D. Wilson<sup>1</sup>, Michael Eisenstein<sup>2,3</sup>, H. Tom Soh<sup>2,3,4\*</sup>

### Affiliations:

<sup>1</sup>Department of Chemical Engineering, Stanford University, Stanford, CA 94305, USA.

<sup>2</sup>Department of Electrical Engineering, Stanford University, Stanford, CA 94305, USA.

<sup>3</sup>Department of Radiology, Stanford University, Stanford, CA 94305, USA.

<sup>4</sup>Chan Zuckerberg Biohub, San Francisco, CA 94158, USA.

\* Correspondence to [tsoh@stanford.edu](mailto:tsoh@stanford.edu)

**Supplemental Calculation 1:** Determination of threshold thermodynamics for design of MIP secondary structure

**Figure S1:** Gel electrophoresis of target DNA before and after circularization

**Table S1:** List of barcodes used for multiplexing

**Table S2:** Experimental conditions for data presented in Figure 5

**Supplemental Calculation 1:** Determining the threshold for efficient circularization. We took care to design MIPs that are predicted to exhibit minimal secondary structure – especially in the hybridization regions – in order to ensure highly efficient circularization. Our threshold was based on the secondary structure thermodynamics that allowed for >90% conversion from linear to circular DNA over five temperature cycles:

$$\Delta G_{folding} = -RT \ln \left( \frac{1 - f_{unfold}}{f_{unfold}} \right) \quad (1)$$

Total conversion,  $\varepsilon$ , is related to the fraction of unfolded MIPs,  $f_{unfold}$ , and the cycle number,  $n$ :

$$\varepsilon = 1 - (1 - f_{unfold})^n \quad (2)$$

we can thus calculate the minimum  $\Delta G_{folding}$  of any individual motif::

$$\Delta G_{folding} \geq -RT \ln \left( \frac{(1 - \varepsilon)^{1/n}}{1 - (1 - \varepsilon)^{1/n}} \right) \quad (3)$$

To achieve >90% circularization in 5 cycles, we must have  $f_{unfold} > 0.37$ . Therefore,  $\Delta G_{folding}$  must be greater than  $-0.33 \frac{kcal}{mol}$  for any secondary structure motif involving one of the anchor sites.  $\Delta G_{folding}$  was calculated on the *mfold* DNA folding form<sup>14</sup> at 37 °C and 10 mM Mg<sup>2+</sup>. A secondary check was performed on NUPACK<sup>13</sup> to determine that  $f_{unfold} > 0.37$  for all bases in both anchor sites.

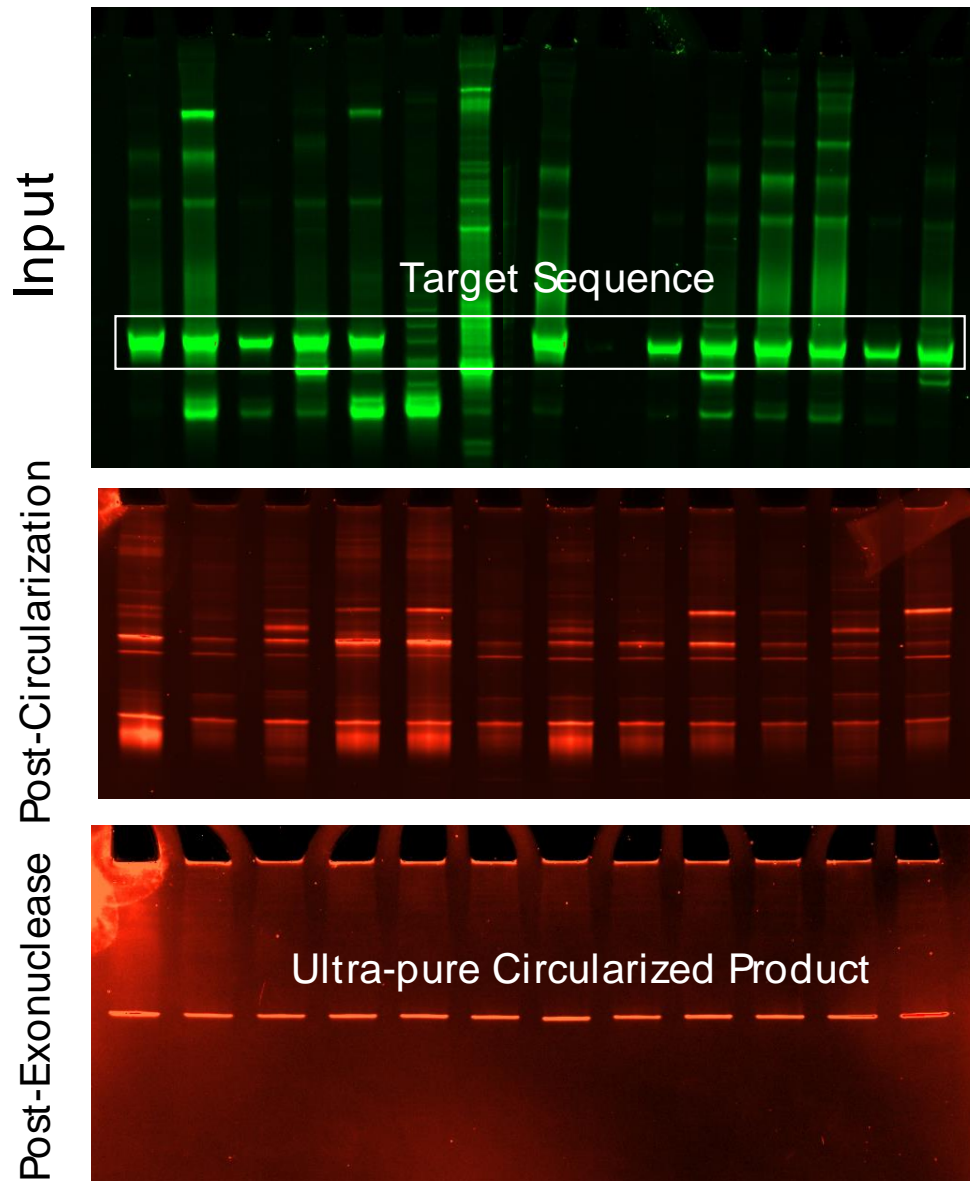

**Supplemental Figure 1:** MIPs can confer ultra-high specificity from a background of non-specific product. (top) PCR amplification can result in a large background of non-specific product, whereas (middle) circularization alone produces multiple bands. (bottom) Treatment with exonucleases I & III leaves only a single band of pure circular product. Top panel is a native TBE gel, whereas the other two panels are TBE-urea denaturing gels.

| Barcode | Sequence            |
|---------|---------------------|
| b1      | 5' -TAGTCATCTCTA-3' |
| b2      | 5' -TACCAGGTCCTA-3' |
| b3      | 5' -TATCCATCCTTA-3' |
| b4      | 5' -TAAGCTCGCATA-3' |
| b5      | 5' -ATCCTCTCCTCA-3' |
| b6      | 5' -CGTCTACGATGC-3' |
| b7      | 5' -CACGAAGTGGAA-3' |
| b8      | 5' -GTTCCCTGTCCC-3' |
| b9      | 5' -ACGTTAAGGCCA-3' |
| b10     | 5' -TCCTCGTGAGGT-3' |
| b11     | 5' -CATCTAACCTAG-3' |
| b12     | 5' -TCGGAATTGGCT-3' |

**Table S1:** List of barcodes used for demultiplexing. Barcodes are located in the MIPs at the site indicated in **Table S2**

| Barcode |        | Input concentration to PCR rxn |           | Fraction of Target 1 |
|---------|--------|--------------------------------|-----------|----------------------|
| Rep. 1  | Rep. 2 | Target #1                      | Target #2 |                      |
| b1      | b7     | 4.5 fM                         | 500 aM    | 0.90                 |
| b2      | b8     | 1.5 fM                         | 500 aM    | 0.75                 |
| b3      | b9     | 500 aM                         | 500 aM    | 0.50                 |
| b4      | b10    | 167 aM                         | 500 aM    | 0.25                 |
| b5      | b11    | 56 aM                          | 500 aM    | 0.10                 |
| b6      | b12    | 0 aM                           | 500 aM    | 0.00                 |

| Barcode |        | Input concentration to PCR rxn |         | Fraction w/ Three SNVs |
|---------|--------|--------------------------------|---------|------------------------|
| Rep. 1  | Rep. 2 | w.t.                           | w/ SNVs |                        |
| b1      | b7     | 500 aM                         | 0 aM    | 0.00                   |
| b2      | b8     | 472 aM                         | 28 aM   | 0.06                   |
| b3      | b9     | 450 aM                         | 50 aM   | 0.10                   |
| b4      | b10    | 400 aM                         | 100 aM  | 0.20                   |
| b5      | b11    | 300 aM                         | 200 aM  | 0.40                   |
| b6      | b12    | 250 aM                         | 250 aM  | 0.50                   |

**Table S2:** Experimental conditions for a) ratiometric and b) SNV experiments. The barcode sequence was used to demultiplex pooled samples (**Table S1**). Values shown represent the concentrations in the mixture added to the PCR reaction.
